# Supplementary material for: Exogenous Melatonin Enhances Dihydrochalcone Accumulation in Lithocarpus litseifolius Leaves via Regulating Hormonal Crosstalk and Transcriptional Profiling
Source: MDPI journal article supplement (doi:10.3390/ijms25094592), 2024-04-23
Supplement: s1 [file s1]

## Supplementary Table

**Table S1** Results statistics of Illumina sequencing data yield

| Sample   | Error rate (%) | Q20 <sup>a</sup> (%) | Q30 <sup>b</sup> (%) | GC content <sup>c</sup> (%) | N50 (bp) | Raw reads   | Clean reads |
|----------|----------------|----------------------|----------------------|-----------------------------|----------|-------------|-------------|
| CK-1     | 0.03           | 96.71                | 91.14                | 44.01                       | 2692     | 67,354,406  | 66,653,228  |
| CK-2     | 0.03           | 97.55                | 93.16                | 44.63                       |          | 59,731,930  | 56,860,846  |
| CK-3     | 0.03           | 96.88                | 91.55                | 43.95                       |          | 64,337,240  | 63,199,648  |
| MLT100-1 | 0.03           | 96.98                | 91.7                 | 44.19                       |          | 131,125,870 | 129,338,674 |
| MLT100-2 | 0.03           | 96.74                | 91.18                | 43.93                       |          | 83,678,868  | 82,604,266  |
| MLT100-3 | 0.03           | 96.69                | 91.15                | 44.32                       |          | 68,333,712  | 66,469,244  |

a Q20: Percentage of bases that account for more than 20 of Phred values.

b Q30: Percentage of bases that account for more than 30 of Phred values.

c GC content: The sum of base G and C accounts for the percentage of total base number.

**Table S2** Information of 20 top enriched KEGG and GO pathways in all comparisons

| ID      | KEGG Term                                           | Input number | Rich factor | p-value    |
|---------|-----------------------------------------------------|--------------|-------------|------------|
| ko00195 | Photosynthesis                                      | 23           | 0.359       | 0.02548502 |
| ko00944 | Flavone and flavonol biosynthesis                   | 2            | 1           | 0.05963888 |
| ko04122 | Sulfur relay system                                 | 4            | 0.571       | 0.06526796 |
| ko00920 | Sulfur metabolism                                   | 11           | 0.379       | 0.07378039 |
| ko00785 | Lipoic acid metabolism                              | 4            | 0.5         | 0.10588440 |
| ko00730 | Thiamine metabolism                                 | 10           | 0.357       | 0.12224470 |
| ko00230 | Purine metabolism                                   | 27           | 0.297       | 0.14681770 |
| ko03060 | Protein export                                      | 15           | 0.319       | 0.15164980 |
| ko00966 | Glucosinolate biosynthesis                          | 4            | 0.444       | 0.15502220 |
| ko00460 | Cyanoamino acid metabolism                          | 20           | 0.303       | 0.16454370 |
| ko00600 | Sphingolipid metabolism                             | 14           | 0.318       | 0.16539250 |
| ko00999 | Biosynthesis of various plant secondary metabolites | 18           | 0.305       | 0.17243980 |
| ko04141 | Protein processing in endoplasmic reticulum         | 66           | 0.269       | 0.19359140 |
| ko00310 | Lysine degradation                                  | 15           | 0.306       | 0.19666060 |
| ko00260 | Glycine, serine and threonine metabolism            | 29           | 0.284       | 0.20041340 |
| ko01040 | Biosynthesis of unsaturated fatty acids             | 10           | 0.323       | 0.20594550 |
| ko00941 | Flavonoid biosynthesis                              | 9            | 0.321       | 0.22684890 |
| ko00440 | Phosphonate and phosphinate metabolism              | 3            | 0.429       | 0.23171100 |
| ko00190 | Oxidative phosphorylation                           | 34           | 0.274       | 0.24565130 |
| ko00904 | Diterpenoid biosynthesis                            | 2            | 0.5         | 0.25207070 |

| GO_accession | Description                                                     | Term_type          | p-value    | DEG_item | DEG_list | Bg_item |
|--------------|-----------------------------------------------------------------|--------------------|------------|----------|----------|---------|
| GO:0005199   | structural constituent of cell wall                             | Molecular Function | 5.32E-05   | 25       | 2775     | 48      |
| GO:0031072   | heat shock protein binding                                      | Molecular Function | 0.00038978 | 7        | 2775     | 8       |
| GO:0043531   | ADP binding                                                     | Molecular Function | 0.00074925 | 93       | 2775     | 276     |
| GO:0005509   | calcium ion binding                                             | Molecular Function | 0.00117946 | 44       | 2775     | 115     |
| GO:0005516   | calmodulin binding                                              | Molecular Function | 0.00134142 | 16       | 2775     | 31      |
| GO:0009341   | beta-galactosidase complex                                      | Cellular Component | 0.00059352 | 5        | 2775     | 5       |
| GO:0016759   | cellulose synthase activity                                     | Molecular Function | 0.00225208 | 17       | 2775     | 35      |
| GO:0016760   | cellulose synthase (UDP-forming) activity                       | Molecular Function | 0.00225208 | 17       | 2775     | 35      |
| GO:0022836   | gated channel activity                                          | Molecular Function | 0.00343044 | 18       | 2775     | 39      |
| GO:0004601   | peroxidase activity                                             | Molecular Function | 0.00404349 | 11       | 2775     | 20      |
| GO:0016772   | transferase activity, transferring phosphorus-containing groups | Molecular Function | 0.00635544 | 265      | 2775     | 927     |
| GO:0032403   | protein complex binding                                         | Molecular Function | 0.00639731 | 29       | 2775     | 75      |
| GO:0016684   | oxidoreductase activity, acting on peroxide as acceptor         | Molecular Function | 0.00658467 | 11       | 2775     | 21      |
| GO:0015276   | ligand-gated ion channel activity                               | Molecular Function | 0.00798472 | 13       | 2775     | 27      |
| GO:0022834   | ligand-gated channel activity                                   | Molecular Function | 0.00798472 | 13       | 2775     | 27      |
| GO:0035251   | UDP-glucosyltransferase activity                                | Molecular Function | 0.01119282 | 20       | 2775     | 49      |
| GO:0008017   | microtubule binding                                             | Molecular Function | 0.01153439 | 13       | 2775     | 28      |
| GO:0005216   | ion channel activity                                            | Molecular Function | 0.01171828 | 25       | 2775     | 65      |
| GO:0015267   | channel activity                                                | Molecular Function | 0.01171828 | 25       | 2775     | 65      |
| GO:0022803   | passive transmembrane transporter activity                      | Molecular Function | 0.01171828 | 25       | 2775     | 65      |

**Table S3** Distribution of the number of DEGs in the GO database

| Category           | Pathway                             | MLT 100 vs CK |
|--------------------|-------------------------------------|---------------|
| Biological Process | metabolic process                   | 1051          |
|                    | cellular process                    | 1011          |
|                    | single-organism process             | 770           |
|                    | organic substance metabolic process | 770           |
| Cellular Component | membrane                            | 354           |
|                    | cell                                | 286           |
|                    | cell part                           | 286           |
| Molecular Function | binding                             | 1713          |
|                    | catalytic activity                  | 1165          |
|                    | heterocyclic compound binding       | 757           |

**Table S4** DEGs associated with the antioxidant enzymes

|                     | Genes                        | MLT100 vs CK<br>(FPKM mean) |
|---------------------|------------------------------|-----------------------------|
| Antioxidant enzymes | <i>SOD</i> (42812/f3p0/887)  | 1.51                        |
|                     | <i>CAT</i> (29712/f5p0/1810) | 6.33                        |
|                     | <i>POD</i> (18736/f4p0/2391) | 6.22                        |
|                     | <i>POD</i> (22158/f2p0/2190) | 2.11                        |
|                     | <i>POD</i> (42497/f2p0/930)  | 1.92                        |
|                     | <i>POD</i> (35061/f5p0/1508) | 1.78                        |
|                     | <i>POD</i> (39139/f2p0/1309) | 1.68                        |
|                     | <i>POD</i> (19285/f5p0/2355) | 1.57                        |

**Table S5** Effect of melatonin on phytohormone contents (ng/g FW) in *L. litseifilus* leaves

|     |        | CK-1    | CK-2    | CK-3    | MLT-100-1 | MLT-100-2 | MLT-100-3 | CK mean        | MLT100 mean  |
|-----|--------|---------|---------|---------|-----------|-----------|-----------|----------------|--------------|
| SA  | SA     | 248.30  | 251.46  | 238.67  | 319.32    | 324.92    | 347.05    | 246.14±6.66    | 330.43±14.66 |
|     | SAG    | 7704.99 | 9237.73 | 8539.86 | 7030.32   | 6953.74   | 6847.14   | 8494.19±767.39 | 6943.73±92   |
| JA  | H2JA   | 0.00    | 0.00    | 0.00    | 1.14      | 0.79      | 0.98      | 0±0            | 0.97±0.18    |
|     | JA-Phe | 0.00    | 0.00    | 0.00    | 0.48      | 0.29      | 0.60      | 0±0            | 0.46±0.16    |
|     | MeJA   | 15.32   | 3.26    | 1.94    | 9.88      | 11.35     | 14.47     | 6.84±7.37      | 11.9±2.35    |
|     | OPDA   | 47.39   | 62.86   | 74.75   | 73.02     | 73.82     | 87.90     | 61.67±13.72    | 78.25±8.37   |
|     | JA-ILE | 13.82   | 15.52   | 14.90   | 9.30      | 9.73      | 8.64      | 14.75±0.86     | 9.22±0.55    |
|     | JA-Val | 0.96    | 0.96    | 0.79    | 0.52      | 0.55      | 0.48      | 0.9±0.1        | 0.52±0.04    |
|     | JA     | 46.38   | 49.64   | 46.36   | 27.97     | 26.96     | 24.61     | 47.46±1.89     | 26.51±1.72   |
| ETH | ACC    | 14.77   | 17.01   | 17.96   | 21.56     | 22.39     | 19.99     | 16.58±1.64     | 21.31±1.22   |

Values are means±SDs (rightmost four columns).

**Table S6** DEGs associated with the biosynthesis of three phytohormone types

|     | Genes                           | MLT100 vs CK<br>(FPKM mean) |
|-----|---------------------------------|-----------------------------|
| SA  | <i>OPR3</i> (43195/f2p0/743)    | <b>3.44</b>                 |
|     | <i>AOC4</i> (28958/f2p0/1847)   | <b>1.63</b>                 |
|     | <i>SGTI</i> (36373/f3p0/1476)   | <b>1.54</b>                 |
| JA  | <i>JAZ</i> (38589/f3p0/1249)    | <b>12.61</b>                |
|     | <i>JAZ</i> (36112/f3p0/1495)    | <b>2.12</b>                 |
|     | <i>JAZ</i> (38011/f2p0/1379)    | <b>1.79</b>                 |
| ETH | <i>ERF105</i> (34493/f9p0/1534) | <b>3.89</b>                 |
|     | <i>ERF105</i> (33916/f3p0/1618) | <b>3.38</b>                 |
|     | <i>ERF102</i> (36892/f4p0/1386) | <b>2.81</b>                 |
|     | <i>ERF17</i> (41133/f22p0/1097) | <b>2.40</b>                 |
|     | <i>ABRI</i> (32460/f8p0/1668)   | <b>2.33</b>                 |
|     | <i>ERF105</i> (26384/f2p0/1971) | <b>2.15</b>                 |
|     | <i>ERF4</i> (38181/f3p0/1348)   | <b>1.94</b>                 |
|     | <i>ERF4</i> (24979/f4p0/2034)   | <b>1.91</b>                 |
|     | <i>ERF11</i> (42043/f2p0/1024)  | <b>1.86</b>                 |
|     | <i>ERF78</i> (41901/f7p0/1019)  | <b>1.83</b>                 |
|     | <i>EIN2</i> (940/f2p0/5032)     | <b>1.62</b>                 |
|     | <i>RAP21</i> (42090/f7p0/1001)  | <b>1.61</b>                 |
|     | <i>RAP24</i> (20073/f5p0/2243)  | <b>1.55</b>                 |
|     | <i>ETR1</i> (13983/f3p0/2719)   | <b>1.53</b>                 |
|     | <i>WR11</i> (32246/f5p0/1664)   | <b>1.51</b>                 |

The numbers represent the fold change values. Numbers in red represent up-expressed by at least 1.5-folds, while numbers in green represent down-expressed by at least 1.5-folds.

**Table S7** DEGs associated with the MYB, bHLH, WD40, and WRKY TFs

|      | Genes                            | MLT100 vs CK<br>(FPKM mean) |
|------|----------------------------------|-----------------------------|
| MYB  | <i>MYB3R-1</i> (6026/f2p0/3497)  | 3.50                        |
|      | <i>MYB4</i> (42638/f2p0/900)     | 2.61                        |
|      | <i>MYB-TT2</i> (39030/f3p0/1305) | 1.56                        |
|      | <i>MYB36</i> (30131/f2p0/1791)   | 1.51                        |
|      | <i>POPTR</i> (20601/f2p0/2280)   | 6.87                        |
|      | <i>POPTR</i> (18275/f3p0/2364)   | 6.02                        |
|      | <i>RVE1</i> (18537/f5p0/2403)    | 3.26                        |
|      | <i>LHY</i> (9957/f5p0/2980)      | 3.22                        |
|      | <i>LHY</i> (7701/f2p0/3312)      | 3.15                        |
|      | <i>RVE7</i> (23013/f2p0/2162)    | 2.89                        |
|      | <i>RVE8</i> (39010/f2p0/1310)    | 2.52                        |
|      | <i>LHY</i> (10618/f6p0/2985)     | 2.09                        |
|      | <i>NCORI</i> (289/f3p0/5996)     | 2.07                        |
|      | <i>LHY</i> (9897/f7p0/3021)      | 1.90                        |
|      | <i>SRM1</i> (32925/f2p0/1672)    | 1.79                        |
|      | <i>RVE7</i> (23202/f3p0/2141)    | 1.75                        |
|      | <i>RID2</i> (14293/f2p0/2695)    | 1.72                        |
|      | <i>MYB1R1</i> (36582/f5p0/1454)  | 1.69                        |
|      | <i>RVE1</i> (19340/f2p0/2372)    | 1.61                        |
| bHLH | <i>ICE1</i> (25728/f3p0/1957)    | 4.90                        |
|      | <i>bHLH130</i> (17136/f2p0/2528) | 2.49                        |
|      | <i>bHLH79</i> (35577/f3p0/1520)  | 2.42                        |
|      | <i>bHLH93</i> (38081/f3p0/1365)  | 2.30                        |
|      | <i>bHLH35</i> (38525/f2p0/1344)  | 2.17                        |
|      | <i>PIF3</i> (14202/f2p0/2702)    | 2.14                        |
|      | <i>bHLH128</i> (29393/f3p0/1828) | 2.13                        |
|      | <i>bHLH128</i> (15009/f2p0/2651) | 1.83                        |
| WD40 | <i>WDR76</i> (31381/f2p0/1736)   | 3.30                        |
|      | <i>WDR20</i> (20462/f2p0/2303)   | 2.92                        |
|      | <i>WDAN11</i> (33576/f3p0/1634)  | 2.29                        |
|      | <i>WDAN11</i> (30394/f2p0/1786)  | 2.29                        |
|      | <i>WDR20</i> (4813/f3p0/3657)    | 2.02                        |
|      | <i>WDR43</i> (18724/f10p0/2389)  | 1.80                        |
|      | <i>WDR26</i> (22794/f3p0/2153)   | 1.79                        |
| WRKY | <i>WRK24</i> (20376/f13p0/2273)  | 11.10                       |
|      | <i>WRK70</i> (33728/f2p0/1597)   | 9.79                        |
|      | <i>WRKY7</i> (36183/f2p0/1488)   | 3.74                        |
|      | <i>WRKY2</i> (13386/f7p0/2732)   | 1.88                        |
|      | <i>WRK72</i> (25547/f2p0/2006)   | 1.88                        |
|      | <i>WRK20</i> (21711/f4p0/2211)   | 1.78                        |
|      | <i>WRKY3</i> (21493/f28p0/2216)  | 1.53                        |
|      | <i>WRK31</i> (18990/f4p0/2375)   | 1.52                        |

**Table S8** DEGs associated with the flavonoid biosynthesis

| Pathway                         | Genes                           | MLT100 vs CK<br>(FPKM mean) |
|---------------------------------|---------------------------------|-----------------------------|
| flavonoid biosynthesis          | <i>PAL</i> (15514/f17p0/2519)   | 1.50                        |
|                                 | <i>4CL</i> (34202/f4p0/1578)    | 5.33                        |
|                                 | <i>4CL</i> (15232/f2p0/2628)    | 2.16                        |
|                                 | <i>4CL</i> (34871/f3p0/1566)    | 2.05                        |
|                                 | <i>4CL</i> (26318/f3p0/1973)    | 1.65                        |
|                                 | <i>C4H</i> (27236/f3p0/1923)    | 5.19                        |
|                                 | <i>C4H</i> (27875/f12p0/1831)   | 1.62                        |
|                                 | <i>HCT</i> (32367/f20p0/1673)   | 1.70                        |
| flavone and flavonol biosynthes | <i>CHI</i> (42775/f2p0/868)     | 2.62                        |
|                                 | <i>FIS</i> (37677/f7p0/1394)    | 3.47                        |
| phenylpropanoid biosynthesis    | <i>CADH9</i> (37130/f7p0/1408)  | 8.14                        |
|                                 | <i>BGL45</i> (30760/f2p0/1685)  | 4.22                        |
|                                 | <i>HIUH</i> (24757/f3p0/2046)   | 2.13                        |
|                                 | <i>BGL11</i> (29948/f26p0/1732) | 2.10                        |
|                                 | <i>PER64</i> (39139/f2p0/1309)  | 1.68                        |
|                                 | <i>BGL12</i> (14915/f2p0/2647)  | 1.61                        |
|                                 | <i>BGL11</i> (23810/f2p0/2123)  | 1.60                        |
|                                 | <i>CADH1</i> (34122/f2p0/1615)  | 1.59                        |

**Table S9** DEGs associated with the UGTs

|     | Genes                             | MLT100 vs CK<br>(FPKM mean) |
|-----|-----------------------------------|-----------------------------|
| UGT | <i>UGT91A1</i> (30673/f2p0/1775)  | 5.83                        |
|     | <i>UGT709C2</i> (29880/f3p0/1805) | 4.25                        |
|     | <i>UGT73C6</i> (28609/f2p0/1803)  | 3.81                        |
|     | <i>UGGT</i> (1122/f2p0/4897)      | 3.75                        |
|     | <i>UGT73C6</i> (29340/f2p0/1828)  | 3.65                        |
|     | <i>UGT76F1</i> (32451/f4p0/1653)  | 2.52                        |
|     | <i>UGT73B4</i> (28849/f3p0/1848)  | 2.43                        |
|     | <i>UGT71K1</i> (19493/f4p0/2347)  | 2.42                        |
|     | <i>UGT71K1</i> (39345/f2p0/1284)  | 2.40                        |
|     | <i>UGT75L6</i> (34509/f4p0/1580)  | 2.39                        |
|     | <i>UGT87A1</i> (33556/f3p0/1639)  | 2.35                        |
|     | <i>UGT85A24</i> (33704/f2p0/1626) | 2.16                        |
|     | <i>UGT83A1</i> (34105/f8p0/1569)  | 2.07                        |
|     | <i>UGT80A2</i> (22882/f2p0/2148)  | 1.94                        |
|     | <i>UGT74E1</i> (33569/f3p0/1598)  | 1.93                        |
|     | <i>UGT709C2</i> (34005/f3p0/1610) | 1.85                        |
|     | <i>UGT92A1</i> (25736/f4p0/2011)  | 1.62                        |
|     | <i>UGT83A1</i> (25357/f2p0/2046)  | 1.57                        |
|     | <i>UGT709C2</i> (32233/f2p0/1732) | 1.56                        |
|     | <i>SGT1B</i> (36373/f3p0/1476)    | 1.54                        |
|     | <i>UGT88A1</i> (32492/f35p0/1640) | 1.53                        |



**Table S10** List of all kits used in this study

| Kit name                                                                                                 | Kit model | Kit website                                                                                                                                                                                                                   | Manufacturer               |
|----------------------------------------------------------------------------------------------------------|-----------|-------------------------------------------------------------------------------------------------------------------------------------------------------------------------------------------------------------------------------|----------------------------|
| Hydrogen Peroxide(H <sub>2</sub> O <sub>2</sub> )<br>Content Assay Kit                                   | BC3590    | <a href="https://www.solarbio.com/goodsInfo?id=38920">https://www.solarbio.com/goodsInfo?id=38920</a>                                                                                                                         | Solarbio(China)            |
| Malondialdehyde(MDA)<br>Content Assay Kit                                                                | BC0020    | <a href="https://www.solarbio.com/goodsInfo?id=6098">https://www.solarbio.com/goodsInfo?id=6098</a>                                                                                                                           | Solarbio(China)            |
| Superoxide Dismutase(SOD)<br>Activity Assay Kit                                                          | BC0175    | <a href="https://www.solarbio.com/goodsInfo?id=9124">https://www.solarbio.com/goodsInfo?id=9124</a>                                                                                                                           | Solarbio(China)            |
| Catalase(CAT) Activity Assay<br>Kit                                                                      | BC0200    | <a href="https://www.solarbio.com/goodsInfo?id=6114">https://www.solarbio.com/goodsInfo?id=6114</a>                                                                                                                           | Solarbio(China)            |
| Peroxidase(POD) Activity<br>Assay Kit                                                                    | BC0090    | <a href="https://www.solarbio.com/goodsInfo?id=6104">https://www.solarbio.com/goodsInfo?id=6104</a>                                                                                                                           | Solarbio(China)            |
| Glutathione Reductases(GR)<br>Activity Assay Kit                                                         | BC1160    | <a href="https://www.solarbio.com/goodsInfo?id=6187">https://www.solarbio.com/goodsInfo?id=6187</a>                                                                                                                           | Solarbio(China)            |
| Phenylalanine<br>Ammonialyase(PAL) Activity<br>Assay Kit                                                 | BC0215    | <a href="https://www.solarbio.com/goodsInfo?id=9128">https://www.solarbio.com/goodsInfo?id=9128</a>                                                                                                                           | Solarbio(China)            |
| Cinnamic acid 4-<br>hydroxylase(C4H) Activity<br>Assay Kit                                               | BC4085    | <a href="https://www.solarbio.com/goodsInfo?id=51045">https://www.solarbio.com/goodsInfo?id=51045</a>                                                                                                                         | Solarbio(China)            |
| 4-Coumarate CoA<br>Ligase(4CL) Activity Assay<br>Kit                                                     | BC4225    | <a href="https://www.solarbio.com/goodsInfo?id=64616">https://www.solarbio.com/goodsInfo?id=64616</a>                                                                                                                         | Solarbio(China)            |
| RNAprep Pure Plant Plus Kit<br>(Polysaccharides&Polyphenoli<br>cs-rich)                                  | DP441     | <a href="https://www.tiangen.com/content/details_40_21390.html">https://www.tiangen.com/content/details_40_21390.html</a>                                                                                                     | Tiangen(China)             |
| TransScript® All-in-One First-<br>Strand cDNA Synthesis<br>SuperMix for qPCR (One-Step<br>gDNA Removal ) | AT341-01  | <a href="https://www.transgenbiotech.com/rt_pcr/transscript_all_in_one_first_strand_cdna_synthesis_for_qpcr.html">https://www.transgenbiotech.com/rt_pcr/transscript_all_in_one_first_strand_cdna_synthesis_for_qpcr.html</a> | TransGen<br>Biotech(China) |
| SuperReal PreMix Color<br>(SYBR Green                                                                    | FP215-02  | <a href="https://www.tiangen.com/content/details_40_21225.html">https://www.tiangen.com/content/details_40_21225.html</a>                                                                                                     | Tiangen(China)             |

**Table S11** Sequence of primer pairs used in qRT-PCR analysis.

| Name           | Gene ID          | Orientation | Sequence(5'-3')            |
|----------------|------------------|-------------|----------------------------|
| <i>PAL</i>     | 15514/f17p0/2519 | Forward     | GCATAGGCGAACCAAGCAA        |
|                |                  | Reverse     | CAGCAATGTAGGATAGAGGGACA    |
| <i>4CL</i>     | 34202/f4p0/1578  | Forward     | ACTGCGAACCCGTTTTACT        |
|                |                  | Reverse     | AACCCTCCACTGGCGACTC        |
| <i>UGT71K1</i> | 19493/f4p0/2347  | Forward     | TGATGTCTTGCCAGAAGGTTTC     |
|                |                  | Reverse     | CCTCCTATTGCTTTGTGAGCC      |
| <i>SOD</i>     | 42812/f3p0/887   | Forward     | GTGAAGGCTGTGGCTGTTCTT      |
|                |                  | Reverse     | TTTGTTAGCAGGATTAATAATGTGGT |
| <i>POD</i>     | 22158/f2p0/2190  | Forward     | GCTATGACCCCGCTTACGA        |
|                |                  | Reverse     | CGGTGAAGAGGAACCTGGATG      |
| <i>MYB-TT2</i> | 39030/f3p0/1305  | Forward     | TGAAATCAAGAACTATTGGAACACC  |
|                |                  | Reverse     | TGATGACATTGACAGCCTTCG      |
| <i>bHLH130</i> | 17136/f2p0/2528  | Forward     | TATGATCTCGGATAATATCACTGGTC |
|                |                  | Reverse     | TCAGCAATGCTTCGTGGGT        |
| <i>SGT1</i>    | 36373/f3p0/1476  | Forward     | CCAGCAGATTAGCACGATTACAT    |
|                |                  | Reverse     | AGCTTTCGCAAGACGGATTT       |
| <i>JAZ</i>     | 38589/f3p0/1249  | Forward     | TAAGGAGGAGGTCCCAAAGATT     |
|                |                  | Reverse     | CACGATTACTTGTCCACCATAGAA   |
| <i>GAPDH</i>   | reference genes  | Forward     | CCTTCCGTGTTCTACCCCCAA      |
|                |                  | Reverse     | TAGCCCAAGATGCCCTTCAGT      |
