# Supplementary material for: Exogenous Melatonin Enhances Dihydrochalcone Accumulation in Lithocarpus litseifolius Leaves via Regulating Hormonal Crosstalk and Transcriptional Profiling
Source: MDPI journal article supplement (doi:10.3390/ijms25094592), 2024-04-23
Supplement: s1 [file s1]

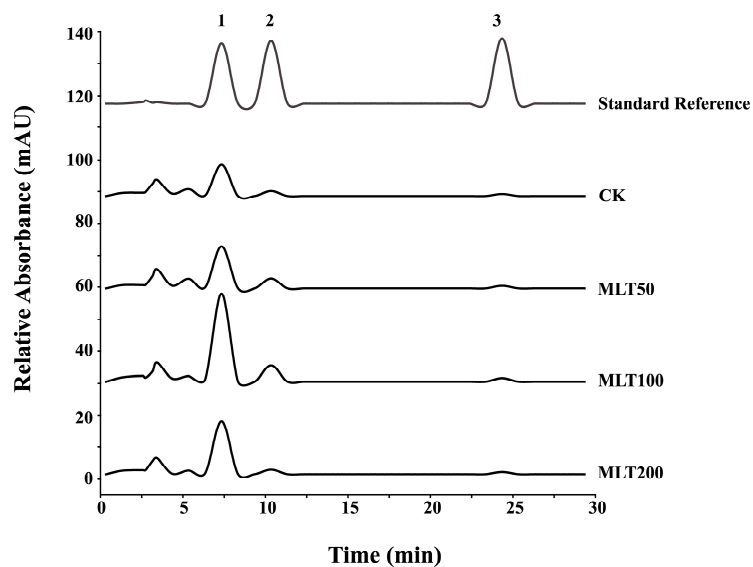

**Figure S1.** HPLC chromatogram of *L. litseifilus* after MLT treatments

HPLC chromatogram of three representative DHC (1 phlorizin, 2 trilobatin; 3 phloretin) in *L. litseifilus* after MLT treatments

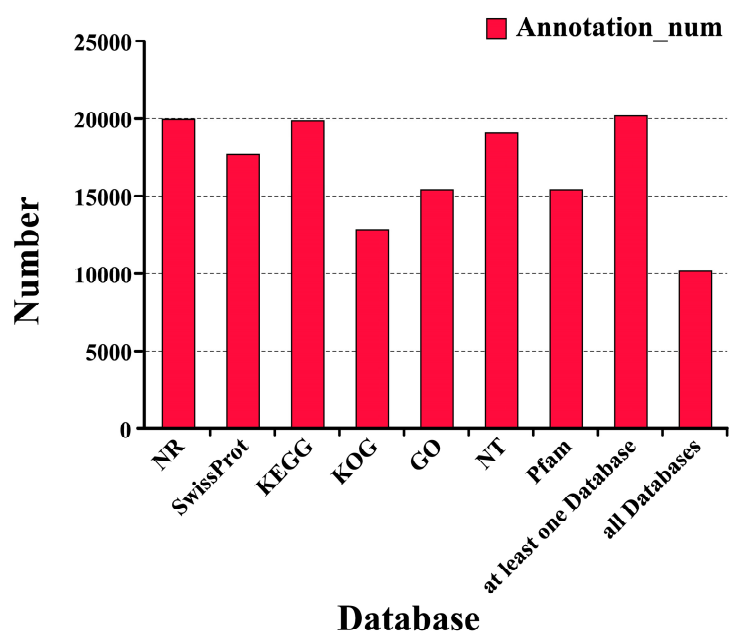

**Figure S2** Functional annotations of *L. litseifilus* in databases.

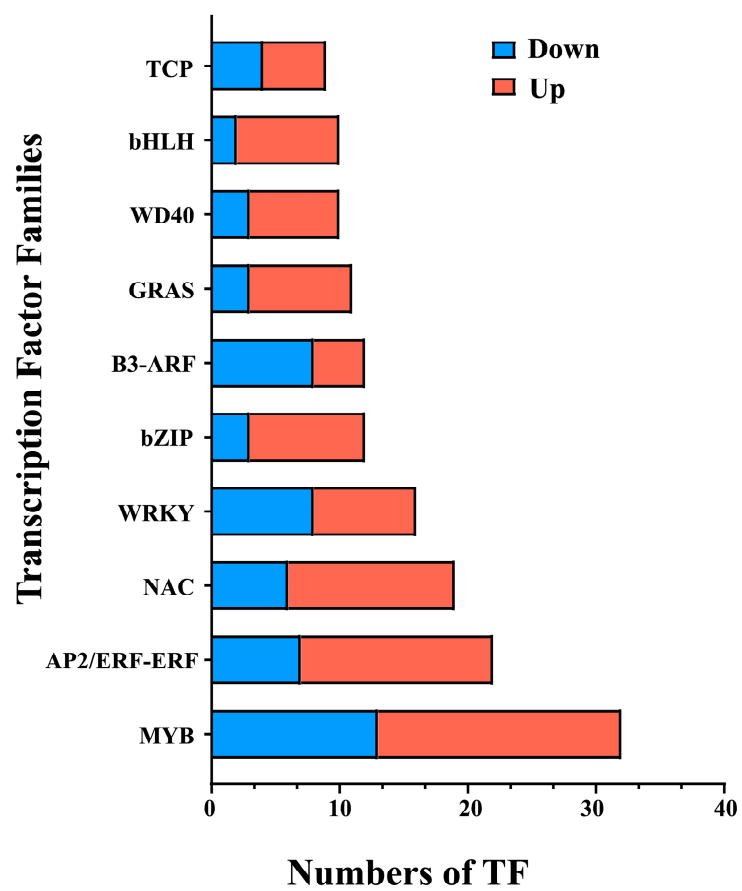

**Figure S3** Identification of DEG numbers in TF families.
